# Supplementary material for: An Aeroplysinin-1 Specific Nitrile Hydratase Isolated from the Marine Sponge Aplysina cavernicola
Source: MDPI journal article supplement (doi:10.3390/md11083046), 2013-08-21
Supplement: s1 [file s1]

marinedrugs-11-03046-s001.mol
  corina  04141405033D 1   1.00000     0.00000 
CORINA 3.49 0023  12.04.2013
 15 15  0  0  0  0  0  0  0  0999 V2000
   -0.2979    1.6927   -0.1548 C   0  0  0  0  0  0  0  0  0  0  0  0
   -0.4928    0.2033   -0.2696 C   0  0  0  0  0  0  0  0  0  0  0  0
    0.6220   -0.4066   -1.1176 C   0  0  0  0  0  0  0  0  0  0  0  0
    1.9638    0.0760   -0.6327 C   0  0  0  0  0  0  0  0  0  0  0  0
    2.1017    1.3106   -0.1645 C   0  0  0  0  0  0  0  0  0  0  0  0
    0.9320    2.2041   -0.0930 C   0  0  0  0  0  0  0  0  0  0  0  0
   -1.8004    2.8400   -0.1059 Br  0  0  0  0  0  0  0  0  0  0  0  0
    1.1064    3.5463    0.0350 O   0  0  0  0  0  0  0  0  0  0  0  0
    1.7114    4.2297   -1.0645 C   0  0  0  0  0  0  0  0  0  0  0  0
    3.7965    1.9216    0.4103 Br  0  0  0  0  0  0  0  0  0  0  0  0
    0.5629   -1.9319   -1.0122 C   0  0  0  0  0  0  0  0  0  0  0  0
    0.4445   -0.0211   -2.4821 O   0  0  0  0  0  0  0  0  0  0  0  0
   -0.4695   -0.3798    1.0348 O   0  0  0  0  0  0  0  0  0  0  0  0
    2.5892   -2.9703   -2.2840 N   0  0  0  0  0  0  0  0  0  0  0  0
    1.7066   -2.5180   -1.7300 C   0  0  0  0  0  0  0  0  0  0  0  0
  1  2  1  0      
  2  3  1  0      
  3  4  1  0      
  4  5  2  0      
  5  6  1  0      
  6  1  2  0      
  1  7  1  0      
  6  8  1  0      
  8  9  1  0      
  5 10  1  0      
  3 11  1  0      
  3 12  1  0      
  2 13  1  0      
 11 15  1  0      
 15 14  3  0      
M  END
$$$$
