# Supplementary material for: An Aeroplysinin-1 Specific Nitrile Hydratase Isolated from the Marine Sponge Aplysina cavernicola
Source: MDPI journal article supplement (doi:10.3390/md11083046), 2013-08-21
Supplement: s2 [file s2]

marinedrugs-11-03046-s001.mol
  ChemDraw04141416572D

 15 15  0  0  0  0  0  0  0  0999 V2000
   -0.6733    0.7652    0.0000 C   0  0  0  0  0  0  0  0  0  0  0  0
   -0.6733   -0.0598    0.0000 C   0  0  0  0  0  0  0  0  0  0  0  0
    0.0412   -0.4722    0.0000 C   0  0  0  0  0  0  0  0  0  0  0  0
    0.7557   -0.0598    0.0000 C   0  0  0  0  0  0  0  0  0  0  0  0
    0.7557    0.7652    0.0000 C   0  0  0  0  0  0  0  0  0  0  0  0
    0.0412    1.1777    0.0000 C   0  0  0  0  0  0  0  0  0  0  0  0
   -1.3877    1.1777    0.0000 Br  0  0  0  0  0  0  0  0  0  0  0  0
    0.0412    2.0027    0.0000 O   0  0  0  0  0  0  0  0  0  0  0  0
    0.7557    2.4152    0.0000 C   0  0  0  0  0  0  0  0  0  0  0  0
    1.4702    1.1777    0.0000 Br  0  0  0  0  0  0  0  0  0  0  0  0
    0.5961   -1.0068    0.0000 C   0  0  0  0  0  0  0  0  0  0  0  0
   -0.3713   -1.1867    0.0000 O   0  0  0  0  0  0  0  0  0  0  0  0
   -1.4702   -0.2733    0.0000 O   0  0  0  0  0  0  0  0  0  0  0  0
    0.0128   -2.4152    0.0000 N   0  0  0  0  0  0  0  0  0  0  0  0
    0.5961   -1.8318    0.0000 C   0  0  0  0  0  0  0  0  0  0  0  0
  1  2  1  0      
  2  3  1  0      
  3  4  1  0      
  4  5  2  0      
  5  6  1  0      
  6  1  2  0      
  1  7  1  0      
  6  8  1  0      
  8  9  1  0      
  5 10  1  0      
  3 11  1  1      
  3 12  1  6      
  2 13  1  1      
 11 15  1  0      
 15 14  3  0      
M  END
