# Supplementary material for: An Aeroplysinin-1 Specific Nitrile Hydratase Isolated from the Marine Sponge Aplysina cavernicola
Source: MDPI journal article supplement (doi:10.3390/md11083046), 2013-08-21
Supplement: s3 [file s3]

marinedrugs-11-03046-s002.mol
  corina  04141405033D 1   1.00000     0.00000 
CORINA 3.49 0023  12.04.2013
 21 21  0  0  0  0  0  0  0  0999 V2000
    0.1303    1.7114   -0.1719 C   0  0  0  0  0  0  0  0  0  0  0  0
    0.0310    0.2121   -0.0715 C   0  0  0  0  0  0  0  0  0  0  0  0
    1.1171   -0.4401   -0.9259 C   0  0  0  0  0  0  0  0  0  0  0  0
    2.4552    0.1761   -0.6151 C   0  0  0  0  0  0  0  0  0  0  0  0
    2.5436    1.4678   -0.3153 C   0  0  0  0  0  0  0  0  0  0  0  0
    1.3244    2.2969   -0.2861 C   0  0  0  0  0  0  0  0  0  0  0  0
   -1.4394    2.7655   -0.1441 Br  0  0  0  0  0  0  0  0  0  0  0  0
    1.4162    3.6504   -0.3737 O   0  0  0  0  0  0  0  0  0  0  0  0
    1.9039    4.1893   -1.6041 C   0  0  0  0  0  0  0  0  0  0  0  0
    4.2259    2.2395    0.0722 Br  0  0  0  0  0  0  0  0  0  0  0  0
    1.1666   -1.9397   -0.6265 C   0  0  0  0  0  0  0  0  0  0  0  0
    0.8095   -0.2410   -2.3309 O   0  0  0  0  0  0  0  0  0  0  0  0
    0.2001   -0.1906    1.3133 O   0  0  0  0  0  0  0  0  0  0  0  0
    2.9805   -3.0657   -2.1244 N   0  0  0  0  0  0  0  0  0  0  0  0
   -0.9094   -0.2701    2.0646 C   0  0  0  0  0  0  0  0  0  0  0  0
   -0.8120   -0.6816    3.5110 C   0  0  0  0  0  0  0  0  0  0  0  0
   -0.3368   -0.7718   -2.7849 C   0  0  0  0  0  0  0  0  0  0  0  0
   -1.0825   -1.3406   -2.0232 O   0  0  0  0  0  0  0  0  0  0  0  0
   -0.6936   -0.6582   -4.2447 C   0  0  0  0  0  0  0  0  0  0  0  0
   -1.9862   -0.0117    1.5812 O   0  0  0  0  0  0  0  0  0  0  0  0
    2.1904   -2.5752   -1.4719 C   0  0  0  0  0  0  0  0  0  0  0  0
  1  2  1  0      
  2  3  1  0      
  3  4  1  0      
  4  5  2  0      
  5  6  1  0      
  6  1  2  0      
  1  7  1  0      
  6  8  1  0      
  8  9  1  0      
  5 10  1  0      
  3 11  1  0      
  3 12  1  0      
  2 13  1  0      
 13 15  1  0      
 15 16  1  0      
 12 17  1  0      
 17 18  2  0      
 17 19  1  0      
 15 20  2  0      
 11 21  1  0      
 21 14  3  0      
M  END
$$$$
