# Supplementary material for: An Aeroplysinin-1 Specific Nitrile Hydratase Isolated from the Marine Sponge Aplysina cavernicola
Source: MDPI journal article supplement (doi:10.3390/md11083046), 2013-08-21
Supplement: s4 [file s4]

marinedrugs-11-03046-s002.mol
  ChemDraw04141416592D

 21 21  0  0  0  0  0  0  0  0999 V2000
    0.0412    0.8829    0.0000 C   0  0  0  0  0  0  0  0  0  0  0  0
    0.0412    0.0579    0.0000 C   0  0  0  0  0  0  0  0  0  0  0  0
    0.7557   -0.3546    0.0000 C   0  0  0  0  0  0  0  0  0  0  0  0
    1.4702    0.0579    0.0000 C   0  0  0  0  0  0  0  0  0  0  0  0
    1.4702    0.8829    0.0000 C   0  0  0  0  0  0  0  0  0  0  0  0
    0.7557    1.2954    0.0000 C   0  0  0  0  0  0  0  0  0  0  0  0
   -0.6733    1.2954    0.0000 Br  0  0  0  0  0  0  0  0  0  0  0  0
    0.7557    2.1204    0.0000 O   0  0  0  0  0  0  0  0  0  0  0  0
    1.4702    2.5329    0.0000 C   0  0  0  0  0  0  0  0  0  0  0  0
    2.1845    1.2954    0.0000 Br  0  0  0  0  0  0  0  0  0  0  0  0
    1.3390   -0.9379    0.0000 C   0  0  0  0  0  0  0  0  0  0  0  0
    0.3432   -1.0690    0.0000 O   0  0  0  0  0  0  0  0  0  0  0  0
   -0.7557   -0.1557    0.0000 O   0  0  0  0  0  0  0  0  0  0  0  0
    1.4902   -2.5329    0.0000 N   0  0  0  0  0  0  0  0  0  0  0  0
   -1.4702    0.2568    0.0000 C   0  0  0  0  0  0  0  0  0  0  0  0
   -2.1845   -0.1557    0.0000 C   0  0  0  0  0  0  0  0  0  0  0  0
   -0.2402   -1.6524    0.0000 C   0  0  0  0  0  0  0  0  0  0  0  0
   -1.0371   -1.4388    0.0000 O   0  0  0  0  0  0  0  0  0  0  0  0
   -0.2402   -2.4774    0.0000 C   0  0  0  0  0  0  0  0  0  0  0  0
   -1.4702    1.0818    0.0000 O   0  0  0  0  0  0  0  0  0  0  0  0
    0.9746   -1.5016    0.0000 C   0  0  0  0  0  0  0  0  0  0  0  0
  1  2  1  0      
  2  3  1  0      
  3  4  1  0      
  4  5  2  0      
  5  6  1  0      
  6  1  2  0      
  1  7  1  0      
  6  8  1  0      
  8  9  1  0      
  5 10  1  0      
  3 11  1  1      
  3 12  1  6      
  2 13  1  1      
 13 15  1  0      
 15 16  1  0      
 12 17  1  0      
 17 18  2  0      
 17 19  1  0      
 15 20  2  0      
 11 21  1  0      
 21 14  3  0      
M  END
