# Supplementary material for: An Aeroplysinin-1 Specific Nitrile Hydratase Isolated from the Marine Sponge Aplysina cavernicola
Source: MDPI journal article supplement (doi:10.3390/md11083046), 2013-08-21
Supplement: s5 [file s5]

marinedrugs-11-03046-s003.mol
  corina  04141405043D 1   1.00000     0.00000 
CORINA 3.49 0023  12.04.2013
 14 14  0  0  0  0  0  0  0  0999 V2000
   -0.0167    1.3819    0.0096 C   0  0  0  0  0  0  0  0  0  0  0  0
    0.0021   -0.0041    0.0020 C   0  0  0  0  0  0  0  0  0  0  0  0
    1.2140   -0.6804   -0.0132 C   0  0  0  0  0  0  0  0  0  0  0  0
    2.4009    0.0265   -0.0203 C   0  0  0  0  0  0  0  0  0  0  0  0
    2.3848    1.4084   -0.0127 C   0  0  0  0  0  0  0  0  0  0  0  0
    1.1759    2.0892    0.0021 C   0  0  0  0  0  0  0  0  0  0  0  0
   -0.9588    1.9100    0.0170 H   0  0  0  0  0  0  0  0  0  0  0  0
    1.1607    3.4481    0.0095 O   0  0  0  0  0  0  0  0  0  0  0  0
    2.4265    4.1110    0.0015 C   0  0  0  0  0  0  0  0  0  0  0  0
    3.3140    1.9588   -0.0182 H   0  0  0  0  0  0  0  0  0  0  0  0
   -1.1651   -0.7001    0.0099 O   0  0  0  0  0  0  0  0  0  0  0  0
    1.2351   -2.1873   -0.0215 C   0  0  0  0  0  0  0  0  0  0  0  0
    1.0096   -3.0464   -2.4736 N   0  0  0  0  0  0  0  0  0  0  0  0
    1.1078   -2.6722   -1.4055 C   0  0  0  0  0  0  0  0  0  0  0  0
  1  2  2  0      
  2  3  1  0      
  3  4  2  0      
  4  5  1  0      
  5  6  2  0      
  6  1  1  0      
  1  7  1  0      
  6  8  1  0      
  8  9  1  0      
  5 10  1  0      
  2 11  1  0      
  3 12  1  0      
 12 14  1  0      
 14 13  3  0      
M  END
$$$$
