# Supplementary material for: An Aeroplysinin-1 Specific Nitrile Hydratase Isolated from the Marine Sponge Aplysina cavernicola
Source: MDPI journal article supplement (doi:10.3390/md11083046), 2013-08-21
Supplement: s6 [file s6]

marinedrugs-11-03046-s003.mol
  ChemDraw04141417022D

 14 14  0  0  0  0  0  0  0  0999 V2000
   -0.7145    0.9104    0.0000 C   0  0  0  0  0  0  0  0  0  0  0  0
   -0.7145    0.0854    0.0000 C   0  0  0  0  0  0  0  0  0  0  0  0
   -0.0000   -0.3271    0.0000 C   0  0  0  0  0  0  0  0  0  0  0  0
    0.7145    0.0854    0.0000 C   0  0  0  0  0  0  0  0  0  0  0  0
    0.7145    0.9104    0.0000 C   0  0  0  0  0  0  0  0  0  0  0  0
   -0.0000    1.3229    0.0000 C   0  0  0  0  0  0  0  0  0  0  0  0
   -1.4289    1.3229    0.0000 H   0  0  0  0  0  0  0  0  0  0  0  0
   -0.0000    2.1479    0.0000 O   0  0  0  0  0  0  0  0  0  0  0  0
    0.7145    2.5604    0.0000 C   0  0  0  0  0  0  0  0  0  0  0  0
    1.4289    1.3229    0.0000 H   0  0  0  0  0  0  0  0  0  0  0  0
   -1.2978   -0.4980    0.0000 O   0  0  0  0  0  0  0  0  0  0  0  0
   -0.0000   -1.1521    0.0000 C   0  0  0  0  0  0  0  0  0  0  0  0
    0.5834   -2.5604    0.0000 N   0  0  0  0  0  0  0  0  0  0  0  0
    0.5834   -1.7354    0.0000 C   0  0  0  0  0  0  0  0  0  0  0  0
  1  2  2  0      
  2  3  1  0      
  3  4  2  0      
  4  5  1  0      
  5  6  2  0      
  6  1  1  0      
  1  7  1  0      
  6  8  1  0      
  8  9  1  0      
  5 10  1  0      
  2 11  1  0      
  3 12  1  0      
 12 14  1  0      
 14 13  3  0      
M  END
